# Supplementary material for: Inactivation of Capicua in adult mice causes T-cell lymphoblastic lymphoma
Source: PubMed Central journal article supplement — Genes Dev. 2017 Jul 15;31(14):1456–68. doi: 10.1101/gad.300244.117 (PMC5588927; doi:10.1101/gad.300244.117), 2017-07-15
Supplement: supp_gad.300244.117_Supplemental_Fig_S1.pdf [file supp_gad.300244.117_Supplemental_Fig_S1.pdf]

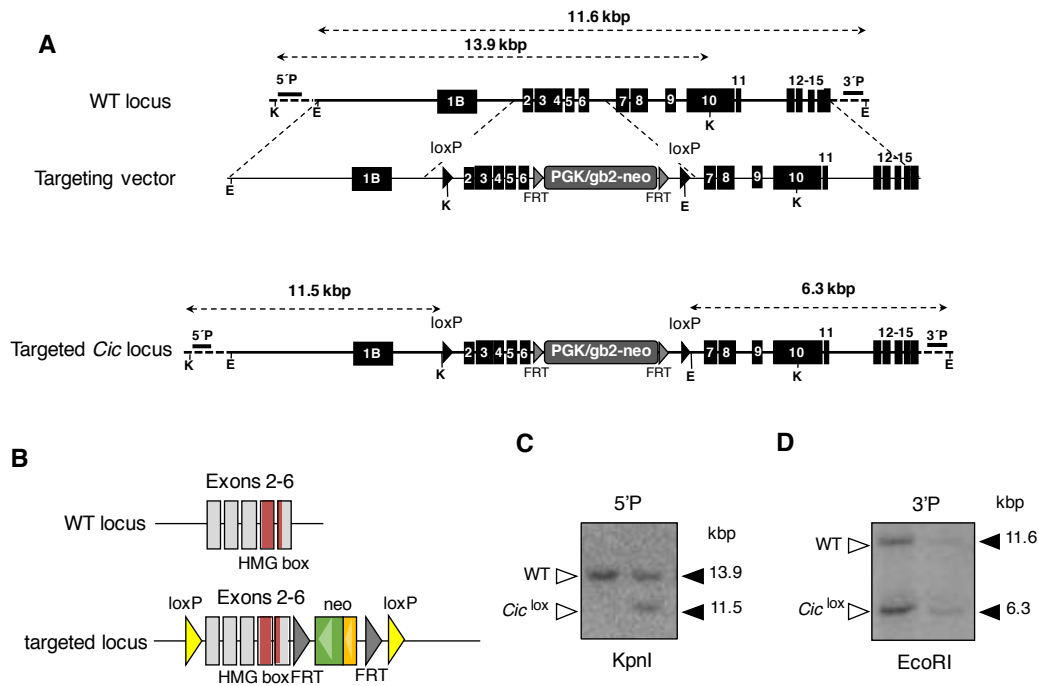

### Supplemental Figure S1. Generation of *Cic*<sup>lox</sup> mice.

(A) Gene targeting strategy: Exons (closed boxes) are numbered by assigning letters A or B for alternatively spliced exons specific for *Cic-L* and *Cic-S* (1A and 1B) and the following exons are consecutively numbered. The *PGK-Neomycin* cassette (gray box), *loxP* sequences (closed triangles) and *frt* sequences (gray triangles) are indicated. The position of the external probes (5'P and 3'P) used for Southern blot analysis and relevant restriction enzyme cleavage sites (K, KpnI; E, EcoRI) are also shown. The diagnostic KpnI DNA fragments for the wild-type (13.9 kbp) and the targeted allele (11.5 kbp) as well as the diagnostic EcoRI DNA fragments for the wild-type (11.6 kbp) and the targeted allele (6.3 kbp) are represented by dotted arrows.

(B) Schematic representation of the exons coding for the HMG-box (brown color, exons 5 and 6) in the wild-type (WT) locus and in the targeted *Cic*<sup>lox</sup> locus. Exons not coding for amino acids corresponding to the HMG-box are indicated as gray boxes. *loxP* sites are indicated by yellow triangles and *frt* sequences by gray triangles. The *PGK-Neomycin*

cassette is shown as a light orange arrow in an orange box followed by a light green arrow in a green box, indicating the orientation of the cassette.

(C) Southern blot analysis of DNA isolated from recombinant ES cell clones carrying wild-type (WT) and/or recombinant alleles ( $Cic^{lox}$ ). The migration and sizes of the diagnostic KpnI DNA fragments probed with probe 5'P for the WT (13.9 kbp) and the  $Cic^{lox}$  (11.5 kbp) alleles are indicated by arrowheads.

(D) Southern blot analysis of DNA isolated from recombinant ES cell clones carrying wild-type (WT) and/or recombinant alleles ( $Cic^{lox}$ ). The migration and sizes of the diagnostic EcoRI DNA fragments probed with probe 3'P for the WT (11.6 kbp) and the  $Cic^{lox}$  (6.3 kbp) alleles are indicated by arrowheads.
