# Supplementary material for: Inactivation of Capicua in adult mice causes T-cell lymphoblastic lymphoma
Source: PubMed Central journal article supplement — Genes Dev. 2017 Jul 15;31(14):1456–68. doi: 10.1101/gad.300244.117 (PMC5588927; doi:10.1101/gad.300244.117), 2017-07-15
Supplement: supp_gad.300244.117_Supplemental_Fig_S2.pdf [file supp_gad.300244.117_Supplemental_Fig_S2.pdf]

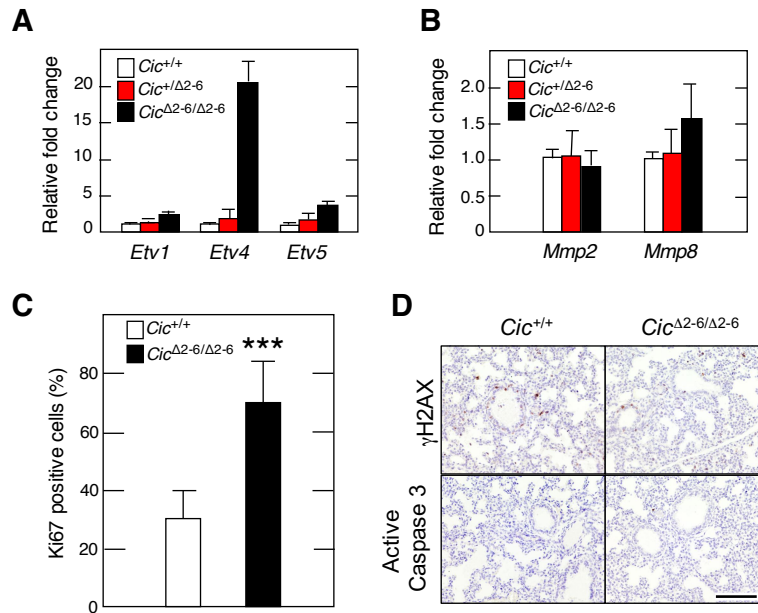

**Supplemental Figure S2.** Characterization of *Cic*-deficient lungs.

(A) Relative expression levels of *Etv1*, *Etv4* and *Etv5* mRNAs in lungs of *Cic*<sup>+/+</sup> (open bars), *Cic*<sup>+/ $\Delta$ 2-6</sup> (red bars) and *Cic* <sup>$\Delta$ 2-6/ $\Delta$ 2-6</sup> embryos (closed bars) at E18.5.  *$\beta$ -Actin* expression levels were used for normalization. Data represent mean  $\pm$  SD.

(B) Relative expression levels of *Mmp2* and *Mmp8* mRNAs in lungs of *Cic*<sup>+/+</sup> (open bars), *Cic*<sup>+/ $\Delta$ 2-6</sup> (red bars) and *Cic* <sup>$\Delta$ 2-6/ $\Delta$ 2-6</sup> embryos at E18.5 (closed bars).  *$\beta$ -Actin* expression levels were used for normalization. Data represent mean  $\pm$  SD.

(C) Quantification of Ki67 positive cells in lung sections of *Cic*<sup>+/+</sup> (n=5) and *Cic* <sup>$\Delta$ 2-6/ $\Delta$ 2-6</sup> (n=5) embryos at embryonic day E18.5. Data represent mean  $\pm$  SD. Asterisks depict statistically significant differences, \*\*\*p < 0.001, unpaired Student's t test.

(D)  $\gamma$ H2AX and active Caspase 3 IHC in lung sections of *Cic*<sup>+/+</sup> and *Cic* <sup>$\Delta$ 2-6/ $\Delta$ 2-6</sup> embryos at embryonic day E18.5. Scale bar represents 50  $\mu$ m.
