# Supplementary material for: Inactivation of Capicua in adult mice causes T-cell lymphoblastic lymphoma
Source: PubMed Central journal article supplement — Genes Dev. 2017 Jul 15;31(14):1456–68. doi: 10.1101/gad.300244.117 (PMC5588927; doi:10.1101/gad.300244.117), 2017-07-15
Supplement: supp_gad.300244.117_Supplemental_Fig_S3.pdf [file supp_gad.300244.117_Supplemental_Fig_S3.pdf]

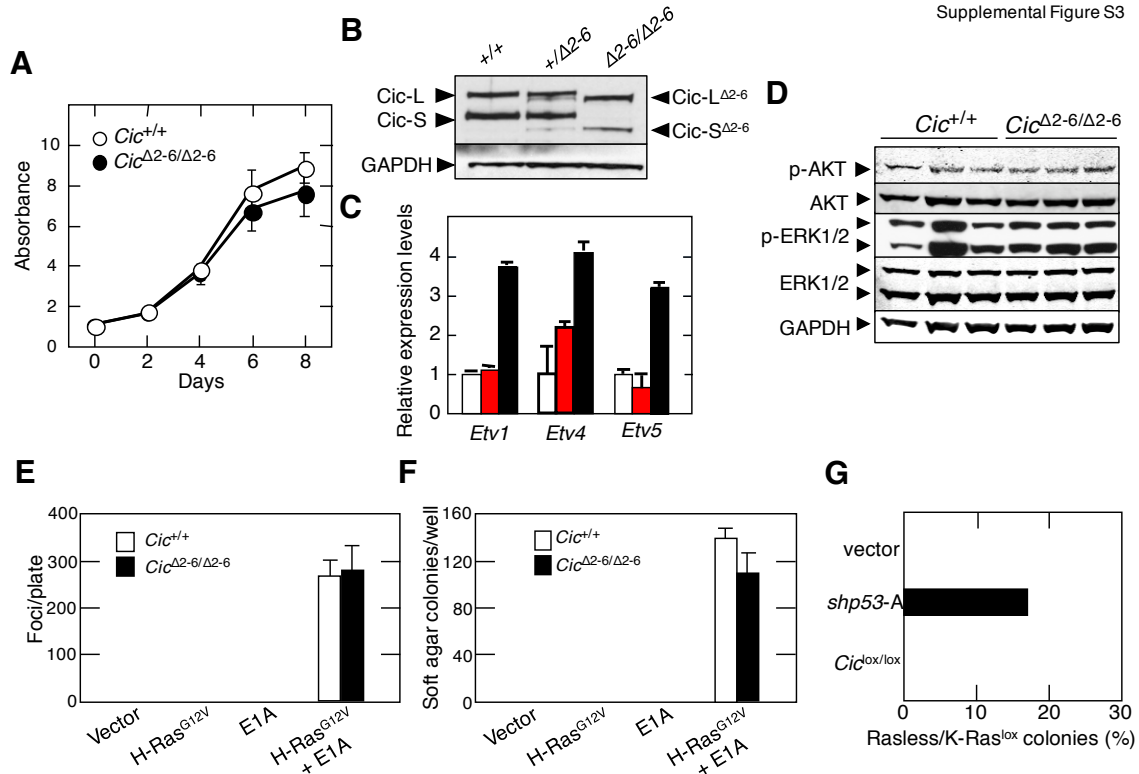

### Supplemental Figure S3. Consequences of Cic inactivation in MEFs.

(A) Proliferation of *Cic*<sup>+/+</sup> (open circles) or *Cic*<sup>Δ2-6/Δ2-6</sup> (closed circles) MEFs for the indicated time. Three independent MEF cultures were used for each genotype. Data represent mean ± SD.

(B) Western blot analysis of Cic protein expression in *Cic*<sup>+/+</sup>, *Cic*<sup>+/Δ2-6</sup> and *Cic*<sup>Δ2-6/Δ2-6</sup> MEFs. GAPDH expression levels served as a loading control.

(C) Relative expression levels of *Etv1*, *Etv4* and *Etv5* mRNAs in *Cic*<sup>+/+</sup> (open bars), *Cic*<sup>+/Δ2-6</sup> (red bars) and *Cic*<sup>Δ2-6/Δ2-6</sup> MEFs (closed bars). *β-Actin* expression levels were used for normalization. Data represent mean ± SD.

(D) Western blot analysis of p-Akt, Akt, p-Erk1/2 and Erk1/2 protein expression in *Cic*<sup>+/+</sup> and *Cic*<sup>Δ2-6/Δ2-6</sup> MEFs. GAPDH expression levels served as a loading control. Three independent MEF cultures were used for each genotype.

(E) Focus formation using *Cic*<sup>+/+</sup> or *Cic*<sup>Δ2-6/Δ2-6</sup> MEFs stably infected with empty retroviruses or retroviruses expressing H-Ras<sup>G12V</sup>, adenoviral E1A or H-Ras<sup>G12V</sup>+E1A. Focus formation was scored after 14 days.

(F) Colony formation in soft agar using *Cic*<sup>+/+</sup> or *Cic*<sup>Δ2-6/Δ2-6</sup> MEFs stably infected with empty retroviruses or retroviruses expressing H-Ras<sup>G12V</sup>, adenoviral E1A or H-Ras<sup>G12V</sup>+E1A. Colony formation was scored after 14 days.

(G) Colony formation using *H-Ras*<sup>-/-</sup>;*N-Ras*<sup>-/-</sup>;*K-Ras*<sup>lox/lox</sup> MEFs stably transduced with an empty vector (negative control), a vector expressing an shRNA against p53 (*shp53-A*, positive control), or *H-Ras*<sup>-/-</sup>;*N-Ras*<sup>-/-</sup>;*K-Ras*<sup>lox/lox</sup>;*Cic*<sup>lox/lox</sup> MEFs infected with adenoviruses expressing GFP or the Cre recombinase. Colony formation is shown as the ratio of colonies that formed after Adeno-Cre (Rasless) vs. Adeno-GFP (*K-Ras*<sup>lox</sup>) infection.
