# Supplementary material for: Inactivation of Capicua in adult mice causes T-cell lymphoblastic lymphoma
Source: PubMed Central journal article supplement — Genes Dev. 2017 Jul 15;31(14):1456–68. doi: 10.1101/gad.300244.117 (PMC5588927; doi:10.1101/gad.300244.117), 2017-07-15
Supplement: supp_gad.300244.117_Supplemental_Fig_S5.pdf [file supp_gad.300244.117_Supplemental_Fig_S5.pdf]

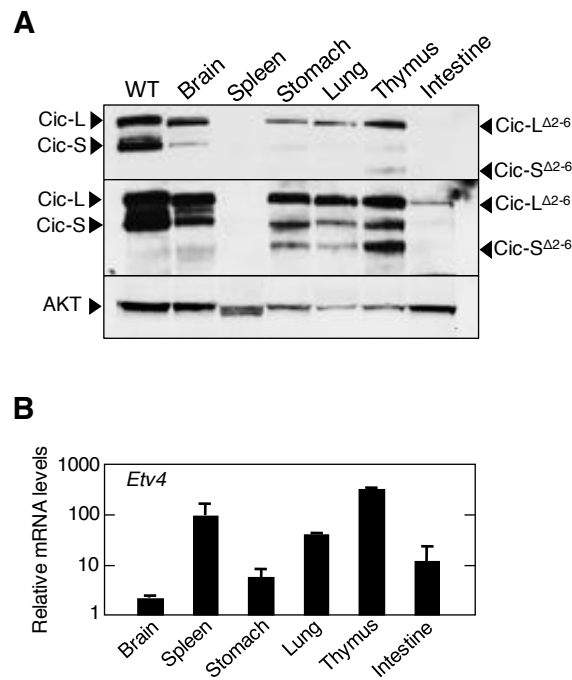

**Supplemental Figure S5. Systemic Cic inactivation.**

(A) Western blot analysis of Cic expression in the indicated tissues obtained from a representative  $Cic^{lox/lox};hUBC-CreERT2^{+/T}$  mouse subjected to Tmx diet for 3 months. Two different exposures for Cic are shown. Akt expression levels served as a loading control.

(B) Relative expression levels of *Etv4* mRNA in the indicated tissues obtained from a representative  $Cic^{lox/lox};hUBC-CreERT2^{+/T}$  mouse subjected to Tmx diet for 3 months.  $\beta$ -*Actin* expression levels were used for normalization. Data represent mean  $\pm$  SD.
