# Supplementary material for: Inactivation of Capicua in adult mice causes T-cell lymphoblastic lymphoma
Source: PubMed Central journal article supplement — Genes Dev. 2017 Jul 15;31(14):1456–68. doi: 10.1101/gad.300244.117 (PMC5588927; doi:10.1101/gad.300244.117), 2017-07-15
Supplement: supp_gad.300244.117_Supplemental_Fig_S6.pdf [file supp_gad.300244.117_Supplemental_Fig_S6.pdf]

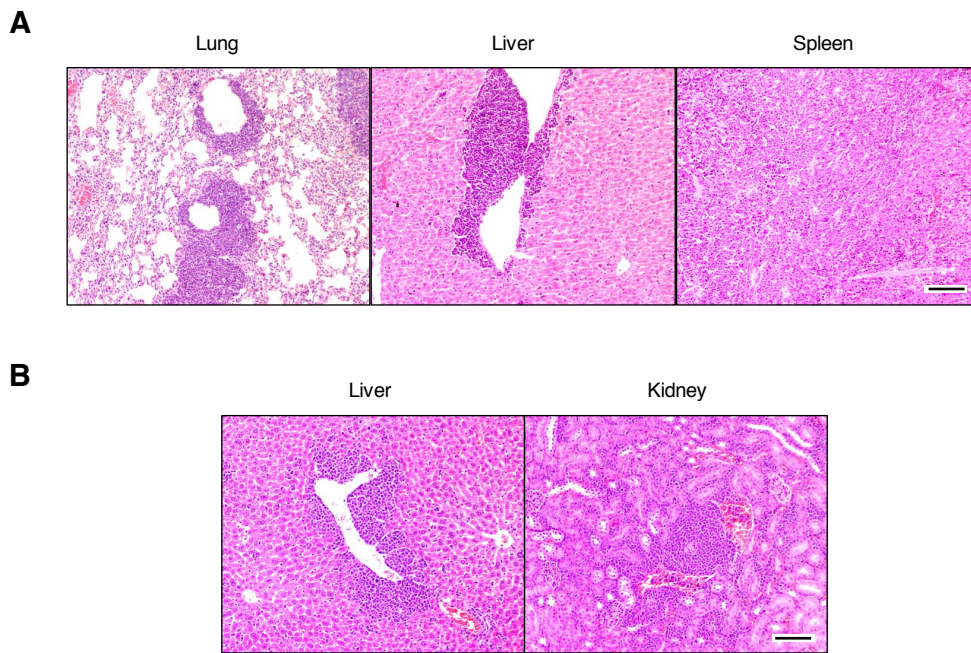

**Supplemental Figure S6.** Characterization of T-ALL induced by *Cic* inactivation.

(A) H&E staining of representative lung, liver and spleen sections of a *Cic*<sup>lox/lox</sup>;*hUBC-CreERT2*<sup>+T</sup> mouse subjected to Tmx diet at humane endpoint. Scale bar represents 50  $\mu\text{m}$ .

(B) H&E staining of representative liver and kidney sections obtained after transplantation of tumor cells from a *Cic*<sup>lox/lox</sup>;*hUBC-CreERT2*<sup>+T</sup> mouse subjected to Tmx diet at humane endpoint into a immunodeficient mouse. Scale bar represents 50  $\mu\text{m}$ .
