# Supplementary material for: Inactivation of Capicua in adult mice causes T-cell lymphoblastic lymphoma
Source: PubMed Central journal article supplement — Genes Dev. 2017 Jul 15;31(14):1456–68. doi: 10.1101/gad.300244.117 (PMC5588927; doi:10.1101/gad.300244.117), 2017-07-15
Supplement: supp_gad.300244.117_Supplemental_Fig_S7.pdf [file supp_gad.300244.117_Supplemental_Fig_S7.pdf]

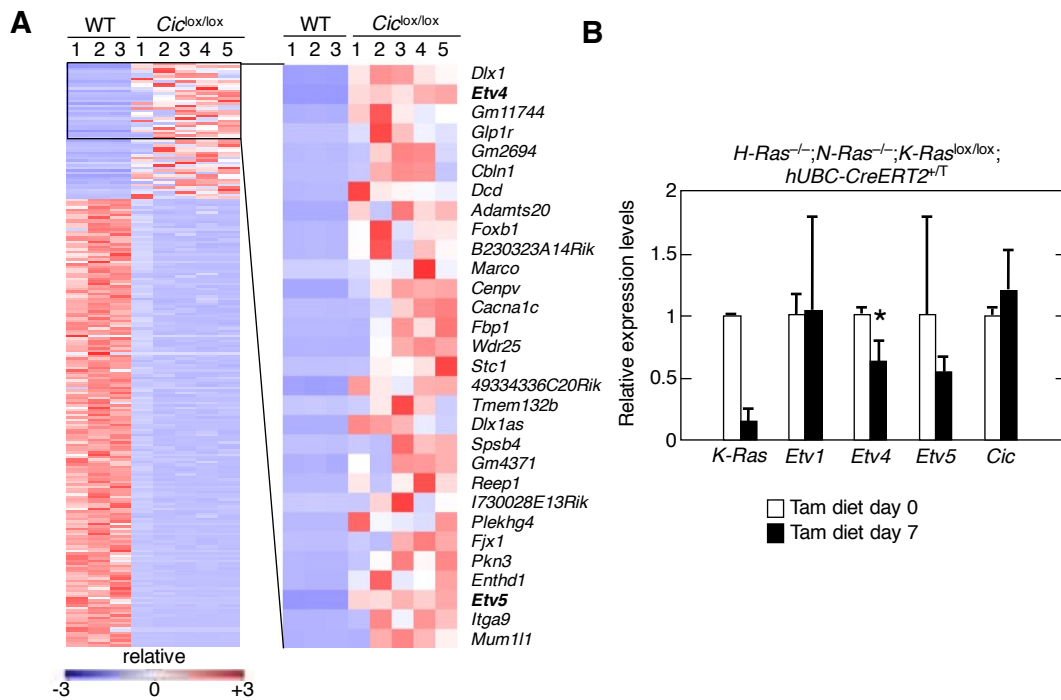

**Supplemental Figure S7.** RNAseq analysis of T-ALL driven by Cic inactivation.

(A) Left: Heatmap displaying differentially expressed genes ( $\log_2FC$  of  $\geq +3$  or  $\leq -3$ ; adjusted p-value  $< 0.05$ ; FDR 0.05) as estimated by RNAseq from WT thymuses and T-ALLs developed in Tmx-treated *Cic<sup>lox/lox</sup>;hUBC-CreERT2<sup>+/T</sup>* mice. Relative expression ( $\log_2FC$ ) is scaled in color code (indicated), from dark blue (-3) to dark red (+3). Right: Zoom into the top 30 highest expressed genes. Gene symbols are also indicated.

(B) Relative expression levels of *K-Ras*, *Etv1*, *Etv4*, *Etv5* and *Cic* mRNAs in thymuses from *H-Ras<sup>-/-</sup>;N-Ras<sup>-/-</sup>;K-Ras<sup>lox/lox</sup>;hUBC-CreERT2<sup>+/T</sup>* mice either left untreated (n=2, open bars) or treated with Tmx diet for 7 days (n=3, closed bars).  $\beta$ -Actin expression levels were used for normalization. Data represent mean  $\pm$  SD. Asterisks depict statistically significant differences, \*p  $< 0.05$ , unpaired Student's t test.
