# Supplementary material for: Inactivation of Capicua in adult mice causes T-cell lymphoblastic lymphoma
Source: PubMed Central journal article supplement — Genes Dev. 2017 Jul 15;31(14):1456–68. doi: 10.1101/gad.300244.117 (PMC5588927; doi:10.1101/gad.300244.117), 2017-07-15
Supplement: supp_gad.300244.117_Supplemental_Fig_S8.pdf [file supp_gad.300244.117_Supplemental_Fig_S8.pdf]

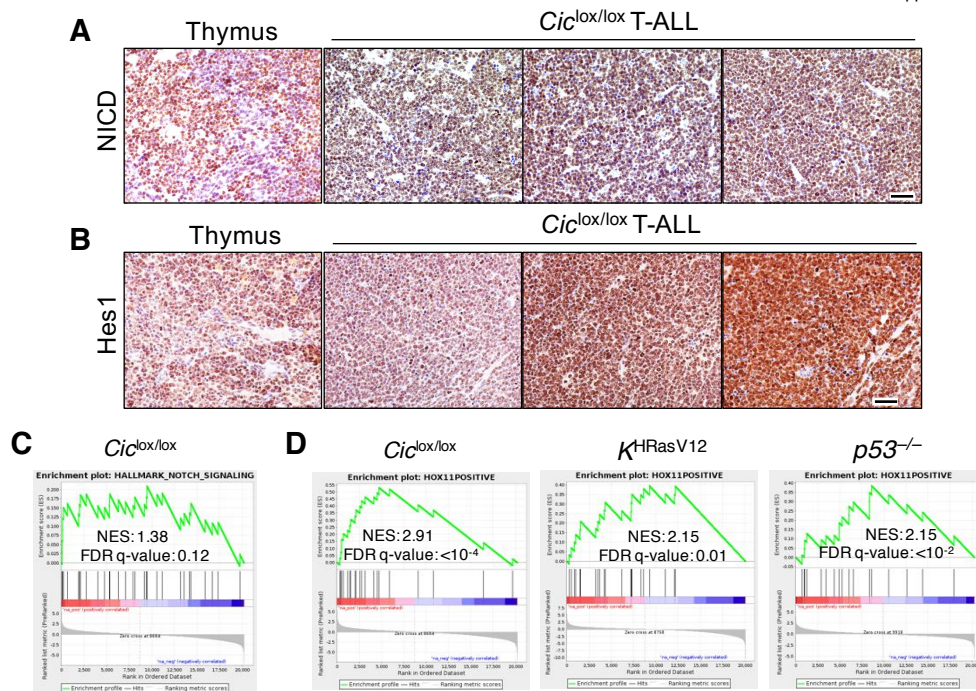

**Supplemental Figure S8.** Activation of the Notch pathway in T-ALL driven by *Cic* inactivation and classification of mouse T-ALLs based on expression profiling.

(A) Cleaved Notch1 (NICD) IHC staining in thymus sections from WT mice or in T-ALL sections obtained from 3 different Tmx-treated  $Cic^{lox/lox};hUBC-CreERT2^{+/T}$  mice at humane endpoint. Scale bar represents 25  $\mu$ m.

(B) Hes1 IHC staining in thymus sections from WT mice or in T-ALL sections obtained from 3 different Tmx-treated  $Cic^{lox/lox};hUBC-CreERT2^{+/T}$  mice at humane endpoint. Scale bar represents 25  $\mu$ m.

(C) Enrichment plot showing significant enrichment (FDR < 25%) of the NOTCH1 hallmark gene set in T-ALL from  $Cic^{lox/lox};hUBC-CreERT2^{+/T}$  mice treated with Tmx diet. NES, normalized enrichment score.

(D) Enrichment plot showing significant enrichment (FDR < 25%) of the TLX1<sup>+</sup> (HOX11<sup>+</sup>) gene signature in T-ALL from  $Cic^{lox/lox};hUBC-CreERT2^{+/T}$  and  $K^{H-}$

$Ras^{G12V};hUBC-CreERT2^{+/T}$  treated with Tmx diet or  $p53^{-/-}$  mice. NES, normalized enrichment score.
