# Supplementary material for: Inactivation of Capicua in adult mice causes T-cell lymphoblastic lymphoma
Source: PubMed Central journal article supplement — Genes Dev. 2017 Jul 15;31(14):1456–68. doi: 10.1101/gad.300244.117 (PMC5588927; doi:10.1101/gad.300244.117), 2017-07-15
Supplement: supp_gad.300244.117_Supplemental_Fig_S9.pdf [file supp_gad.300244.117_Supplemental_Fig_S9.pdf]

A

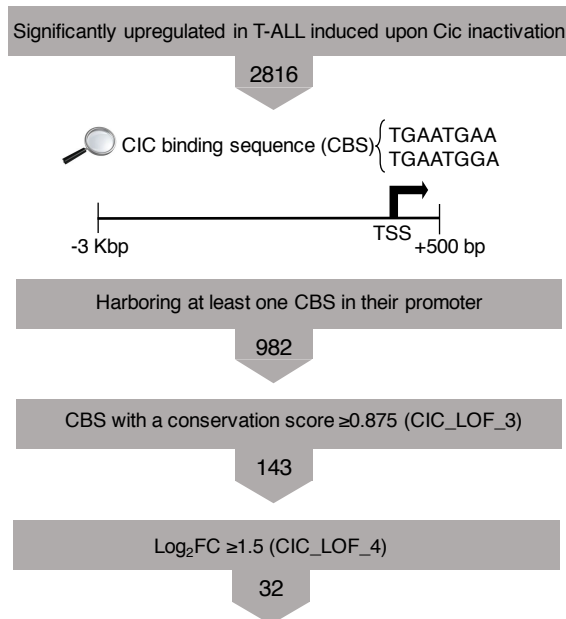

B

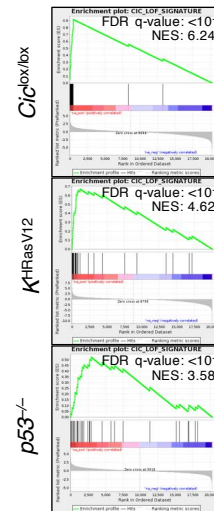

### Supplemental Figure S9. Establishment of a Cic LOF gene signature.

(A) Outline for establishment of a gene signature indicative of Cic LOF. First, we selected all genes that are significantly upregulated in T-ALL induced upon Cic inactivation vs. WT thymuses (2816 genes). After that we eliminated all genes not carrying a Cic binding site (CBS) in their promoter (982 genes remaining). Then, we applied a conservation score of  $>0.875$  for these CBS (143 genes remaining). Finally, we selected those genes that presented expression levels higher or equal to  $\log_2$  FC of 1.5 (32 genes remaining).

(B) Enrichment plot showing significant enrichment (FDR  $< 25\%$ ) of the 32 gene Cic LOF signature in T-ALLs developed in Tmx-treated  $Cic^{\text{lox/lox}};hUBC-CreERT2^{+/T}$ ,  $K^{\text{HRasV12}};hUBC-CreERT2^{+/T}$  or  $p53^{-/-}$  mice at humane endpoint. NES, normalized enrichment score.
