# Supplementary material for: Inactivation of Capicua in adult mice causes T-cell lymphoblastic lymphoma
Source: PubMed Central journal article supplement — Genes Dev. 2017 Jul 15;31(14):1456–68. doi: 10.1101/gad.300244.117 (PMC5588927; doi:10.1101/gad.300244.117), 2017-07-15
Supplement: supp_gad.300244.117_Supplemental_Fig_S10.pdf [file supp_gad.300244.117_Supplemental_Fig_S10.pdf]

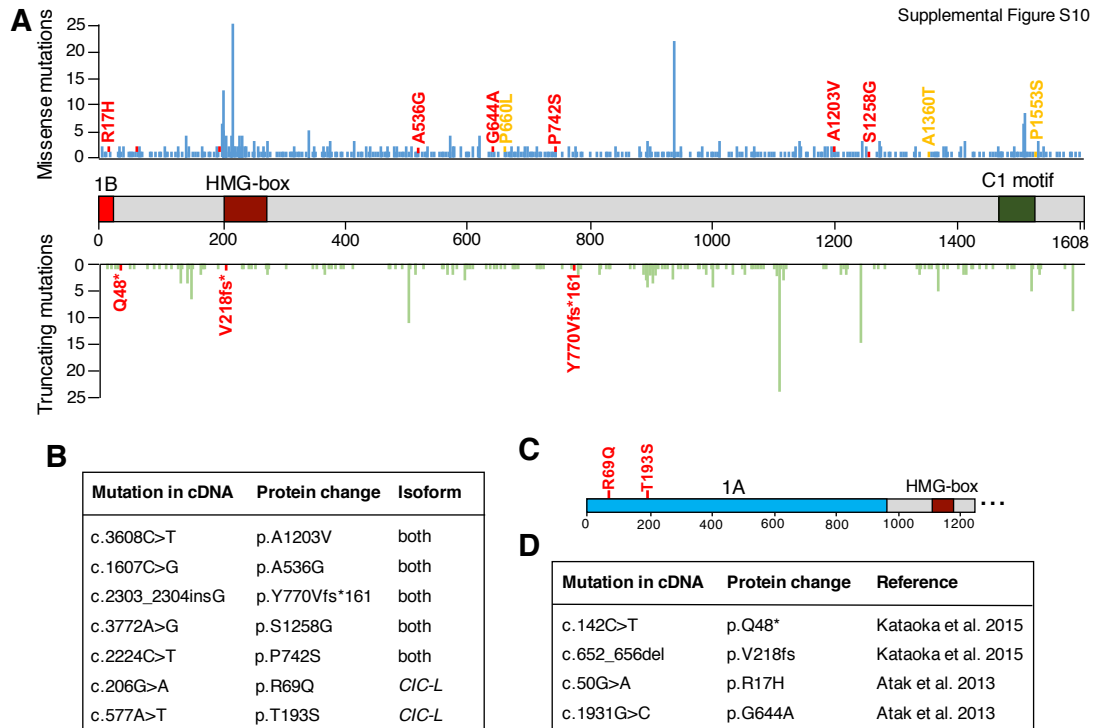

**Supplemental Figure S10.** Schematic representation of somatic *CIC* mutations in human cancer.

(A) Missense (blue) and truncating (green) mutations are plotted according to the localization in human *CIC-S*. Mutations identified in human T-ALL are shown in red and mutations in human T-ALL cell lines in orange. The HMG-box (brown) and the C1 motif (dark green) are indicated. Exon 1B selective for the *CIC-S* isoform is shown in red.

(B) *CIC* mutations identified in childhood T-ALL patient samples. Mutations were identified in 7 of 69 patients by targeted exon sequencing and are indicated based on the reference transcript ID ENST00000575354.2 (*CIC-S*) or ENST00000572681.2 (*CIC-L*, for the c.206G>A and c.577A>T mutations).

(C) Schematic representation of *CIC* mutations in exon 1A (blue, selective for *CIC-L* isoform).

(D) Additional *CIC* mutations identified in the studies by Atak et al. 2013 (2 mutations in 31 patient samples) and Kataoka et al. (2 mutations in 426 adult patient samples).
