# Supplementary material for: Inactivation of Capicua in adult mice causes T-cell lymphoblastic lymphoma
Source: PubMed Central journal article supplement — Genes Dev. 2017 Jul 15;31(14):1456–68. doi: 10.1101/gad.300244.117 (PMC5588927; doi:10.1101/gad.300244.117), 2017-07-15
Supplement: supp_gad.300244.117_Supplemental_Fig_S11.pdf [file supp_gad.300244.117_Supplemental_Fig_S11.pdf]

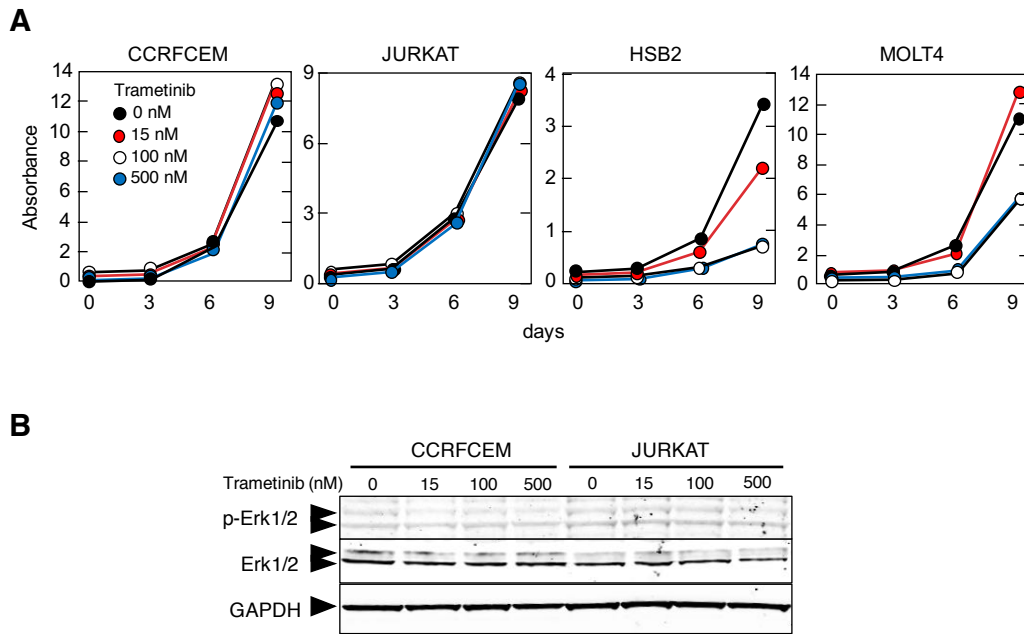

**Supplemental Figure S11.** Trametinib sensitivity of human T-ALL cell lines.

(A) Proliferation of CCRFCEM, JURKAT, HSB2 and MOLT4 cell lines exposed to the indicated concentrations of Trametinib.

(B) Western blot analysis of p-ERK1/2 and total ERK1/2 expression in CCRFCEM and JURKAT cells treated with the indicated concentrations of Trametinib for 24h. GAPDH expression served as a loading control.
